# Supplementary material for: Motivations and Barriers for the Use of Face Coverings during the COVID-19 Pandemic: Messaging Insights from Focus Groups
Source: MDPI journal article supplement (doi:10.3390/ijerph17249298), 2020-12-12
Supplement: s1 [file s1]

## Focus Group Discussion Guide

1. In what situations, if any, do you wear face coverings?
  - a. *Probe for specific situations: (1) when running errands, (2) when visiting with friends and family, (3) when at work outside the home*
  - b. *What type of face covering do you wear in these situations?*
  - c. *How frequently do you wear it in this situation?*
  - d. *Why do you wear it in this situation?*
  - e. *How do you feel about wearing a face covering?*
2. What are some of the reasons you wear a face covering?
  - a. *How does the behavior of people around you affect your decision to wear a face covering?*
  - b. *What about enforcement of requirements to wear face coverings?*
  - c. *What have you heard about whether face coverings can prevent people from getting COVID-19?*
3. In what situations do you not usually wear face coverings?
  - a. *Probe for specific situations: (1) when running errands, (2) when visiting with friends and family, (3) when at work outside the home*
4. What are some of the reasons you do not wear a face covering in these situations?
5. What do you think are some of the reasons that other people in your community, including your family and friends, don't wear face coverings?
  - a. *How do your friends or family react if you wear a face covering around them?*
6. Can you think of any messages that were especially memorable or meaningful for encouraging the use of face coverings?
  - a. *Whose opinions about face coverings are most important to you?*
  - b. *Who do you turn to for advice about face coverings?*
7. I'm going to display a few messages about face coverings and I would like to hear your opinions about them. What do you think about this message?
  - a. *What do you like about this message? What do you dislike about this message?*
  - b. *How could this message be improved?*
  - c. *Does this message make you want to use face coverings?*
  - d. *Who do you think this message is written for?*
  - e. *What image comes to mind when you hear this message?*

**Table S1.** Sample face covering messages tested in focus groups with North Carolina residents

| Theme | Sample Messages                                                                                                               |
|-------|-------------------------------------------------------------------------------------------------------------------------------|
| 1     | Mask on. To carry on.                                                                                                         |
|       | Mask up. To open up.                                                                                                          |
|       | Cover your face. Keep some space. #StayStrongNC                                                                               |
| 2     | Please wear a face covering to speed up NC's recovery.                                                                        |
|       | Vice President Mike Pence believes wearing a face covering is a good idea. Follow his lead.                                   |
| 3     | Friends don't let friends go out without a mask.                                                                              |
|       | You wouldn't wish it on your enemy, so why risk giving it to your friend? Please wear a face covering around others.          |
|       | Make sure your memories don't turn into regrets. Wear a face covering around others.                                          |
| 4     | Protect your grandmother, your neighbor with cancer, and your best friend with asthma. Use face coverings when out in public. |
|       | Help keep loved ones safe. Use face coverings when out in public.                                                             |
